# Supplementary material for: Role of Lewis Acid Metal Centers in Metal–Organic Frameworks for Ultrafast Reduction of 4-Nitrophenol
Source: MDPI journal article supplement (doi:10.3390/catal12050494), 2022-04-29

# Role of Lewis Acid Metal Centers in Metal–Organic Frameworks for Ultrafast Reduction of 4-Nitrophenol

Jagannath Panda <sup>1,†</sup>, Soumya Prakash Biswal <sup>2,†</sup>, Himanshu Sekhar Jena <sup>3,\*</sup>, Arijit Mitra <sup>4</sup>, Raghabendra Samantray <sup>1,2,\*</sup> and Rojalin Sahu <sup>1,\*</sup>

<sup>1</sup> Future Materials Laboratory, Department Of Chemistry, School of Applied Sciences, KIIT Deemed to be University, Bhubaneswar 751024, India; jagannath.panda777@gmail.com

<sup>2</sup> School of Chemical Technology, KIIT Deemed to be University, Bhubaneswar 751024, India, biswalsoumya86@gmail.com

<sup>3</sup> Department of Chemistry, Ghent University, Krijgslaan 281-S3 B, 9000 Ghent, Belgium

<sup>4</sup> Institute of Physics, Bhubaneswar 751005, Odisha, India; arijit01@gmail.com

\* Correspondence: hsjena@gmail.com (H.S.J.); rsamantray@gmail.com (R.S.); rsahufch@kiit.ac.in (R.S.)

† These authors contributed equally to this work.

**Abstract:** Metal–Organic Frameworks (MOFs) can be a good alternative to conventional catalysts because they are non-toxic and can be selective without compromising efficiency. Nano MOFs such as UiO-66 have proven themselves to be competitive in the catalytic family. In this study, we report the excellent catalytic behavior of UiO-66 MOF in the reduction of a model reaction: 4-Nitrophenol (4-NP) to 4-Aminophenol (4-AP) over MOF-5 (Zn-BDC) and MIL-101 (Fe-BDC). Nano UiO-66 crystals were synthesized by a hydrothermal process and characterized by Powder X-ray Diffraction, Diffused Reflectance UV-Vis spectroscopy, Scanning Electron Microscopy, and Transmission Electron Microscopy. The catalysts' performance during the hydrogenation reduction reaction from 4-NP to 4-AP was investigated in the presence of a reducer, NaBH<sub>4</sub>. The UiO-66 nano crystals exhibited excellent catalytic behavior owing to its large surface area and Lewis acidic nature at the metal nodes. Furthermore, UiO-66 showed excellent recyclability behavior, verified during repeated consecutive use in a sequence. The catalyst yielded similar catalytic behavior during the reduction of nitrophenols at each cycle, which is a novel finding.

**Keywords:** nano-metal organic frameworks (MOFs); UiO-66; catalyst; reduction reactions; reusability

**Citation:** Panda, J.; Biswal, S.P.; Jena, H.S.; Mitra, A.; Samantray, R.; Sahu, R. Role of Lewis Acid Metal Centers in Metal–Organic Frameworks for Ultrafast Reduction of 4-Nitrophenol. *Catalysts* **2022**, *12*, 494. <https://doi.org/10.3390/catal12050494>

Academic Editors: Antal Csampai and Tamás Jernei

Received: 5 March 2022

Accepted: 20 April 2022

Published: 28 April 2022

**Publisher's Note:** MDPI stays neutral with regard to jurisdictional claims in published maps and institutional affiliations.

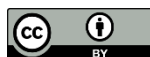

**Copyright:** © 2022 by the authors. Licensee MDPI, Basel, Switzerland. This article is an open access article distributed under the terms and conditions of the Creative Commons Attribution (CC BY) license (<http://creativecommons.org/licenses/by/4.0/>).

### Synthesis of MIL-101(Fe)

A solvothermal method was used to synthesize MIL-101 (Fe-BDC). In a typical synthesis,  $\text{FeCl}_2 \cdot 4\text{H}_2\text{O}$  (4 mmol, 0.80 g) and terephthalic acid (4 mmol, 0.67 g) were dissolved in 30 mL DMF, respectively. To speed up the dissolution process, an ultrasonic-assisted or stirring method was used. The two solutions were then transferred into a 100 mL Teflon-lined autoclave, and HF (0.8 mL, 5 M) was added. The resulting mixture was agitated for 10 minutes by using an ultrasonic instrument. Finally, the autoclave was placed in a 150 °C oven for 24 hours. The sample was centrifuged after being cooled to room temperature in air and washed with DMF, methanol, and water. The product was dried in a vacuum oven at 60 °C.

### Synthesis of MOF-5 (Zn-BDC)

The Zn-BDC MOF (MOF-5) was synthesized by using Zinc acetate dihydrate (2.111 gm) (9.61 mmol) and 1,4-benzene dicarboxylic acid (0.631 gm) (3.8 mmol). These two precursors were dissolved individually in 30 ml of dimethylformamide (DMF) in a 60 ml glass vial in which 1.5 ml of triethanolamine was added drop-wise with constant stirring. The resulting mixture was ultra-sonicated for about 10 minutes for the uniform suspension of particles, transferred to a Teflon-lined autoclave, and placed in an oven at 90 °C for 24 hours. The reaction mixture was cooled to room temperature, then filtered off and washed three times with DMF and four times with  $\text{CHCl}_3$  to remove the unreacted linker. The resulting as-synthesized material when dried under vacuum at 80 °C for 24 hours gives colorless sample.

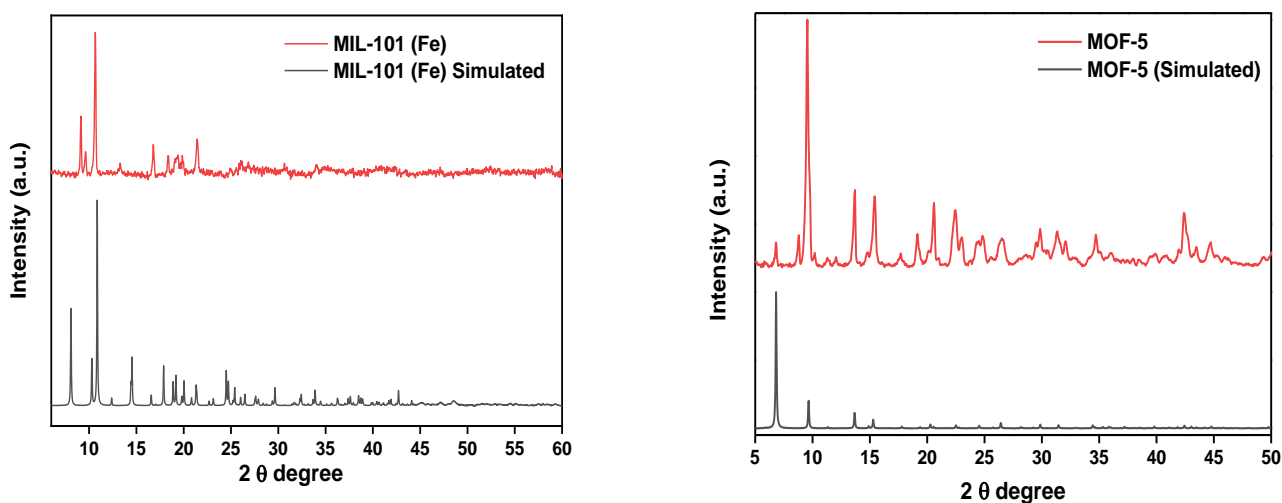

Figure S1. PXRD patterns of MIL-101(Fe) and MOF-5.

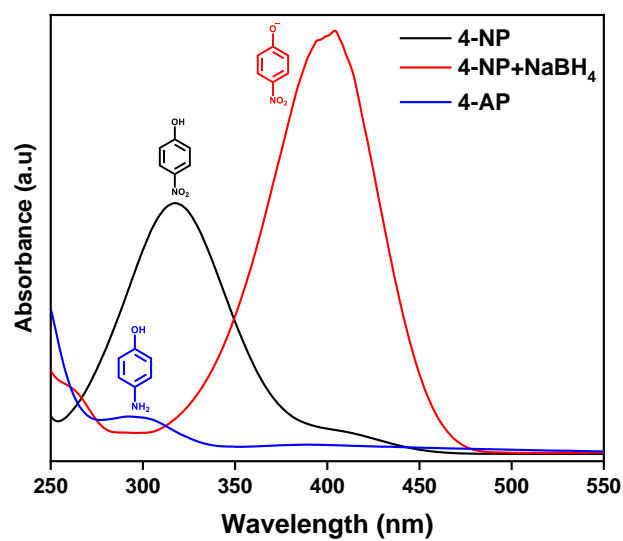

**Figure S2.** UV-vis spectra for 4-nitrophenol (black line) 4-nitrophenoxide (red line) and 4-aminophenol (blue line) in solutions.

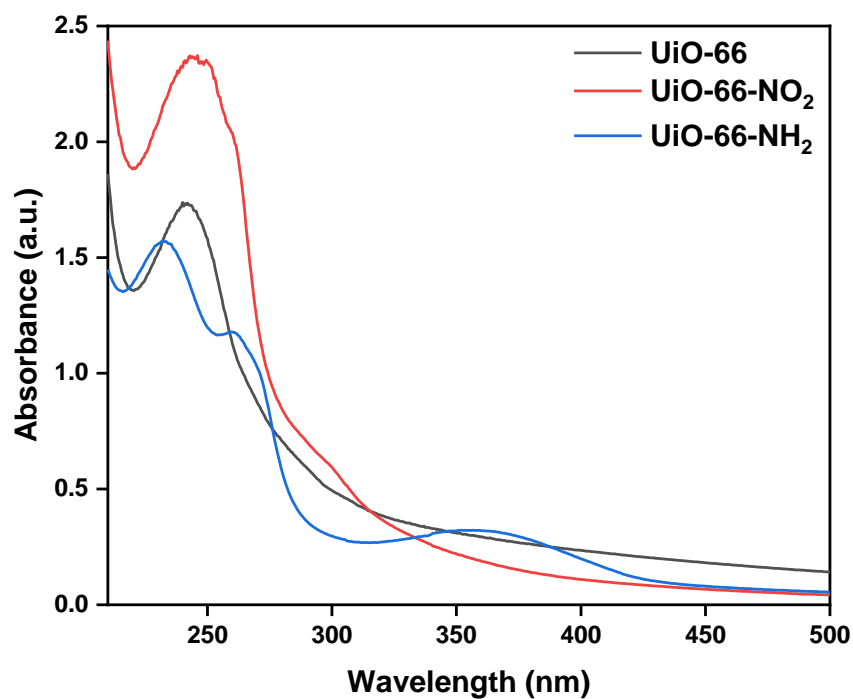

**Figure S3.** UV-vis spectra for UiO-66 (black line) UiO-66-NO<sub>2</sub> (red line) and UiO-66-NH<sub>2</sub> (blue line) in solutions.

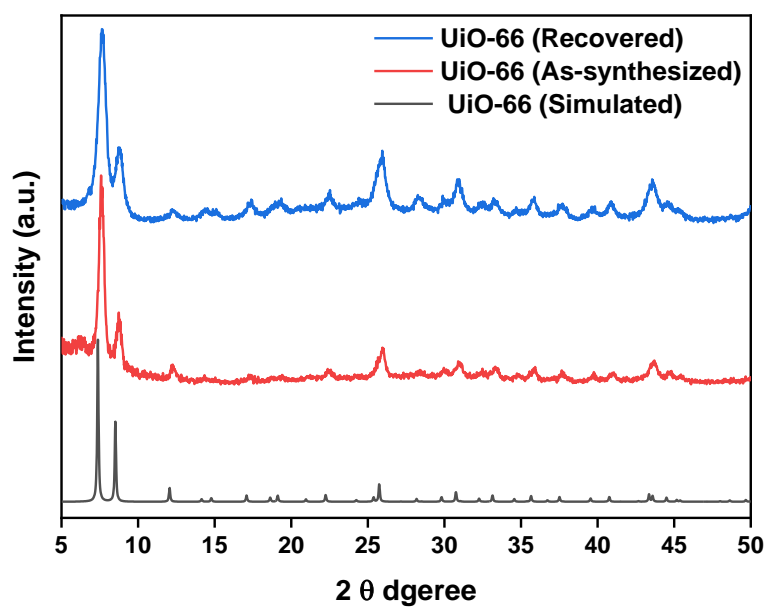

Figure S4. XRD of UiO-66 as-synthesized and after catalysis.

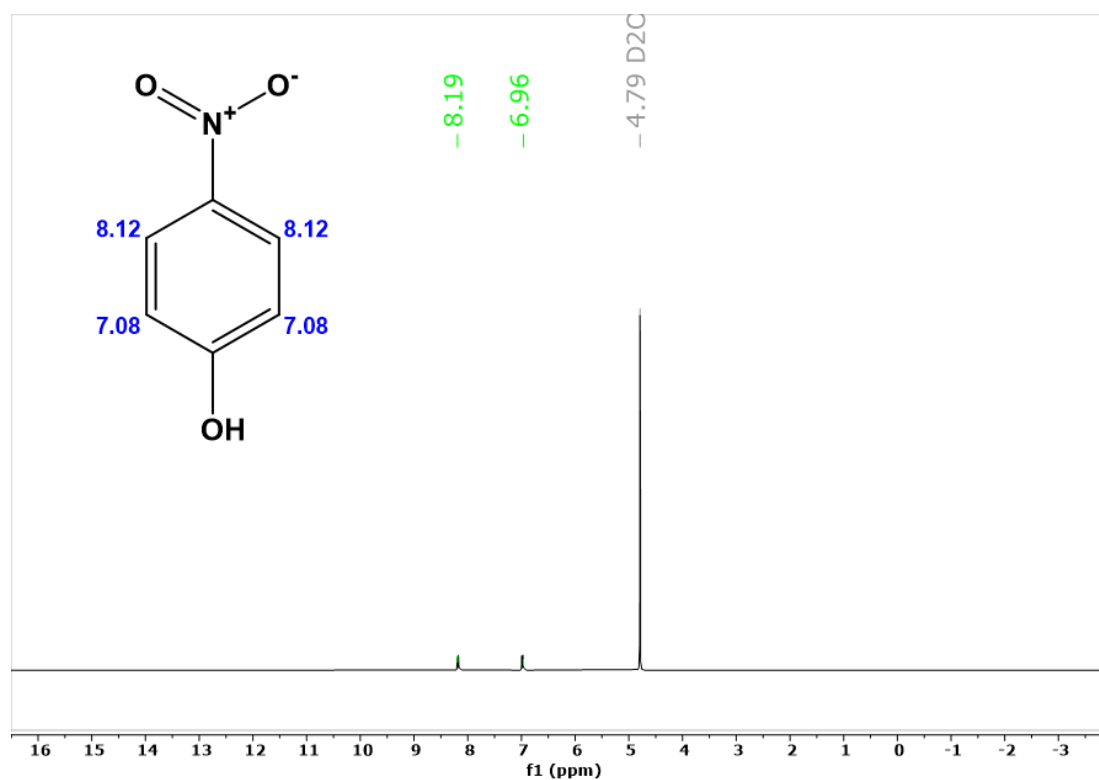

Figure S5.  $^1\text{H}$  NMR spectra of reactant before the reaction showing the 4-NP peak.

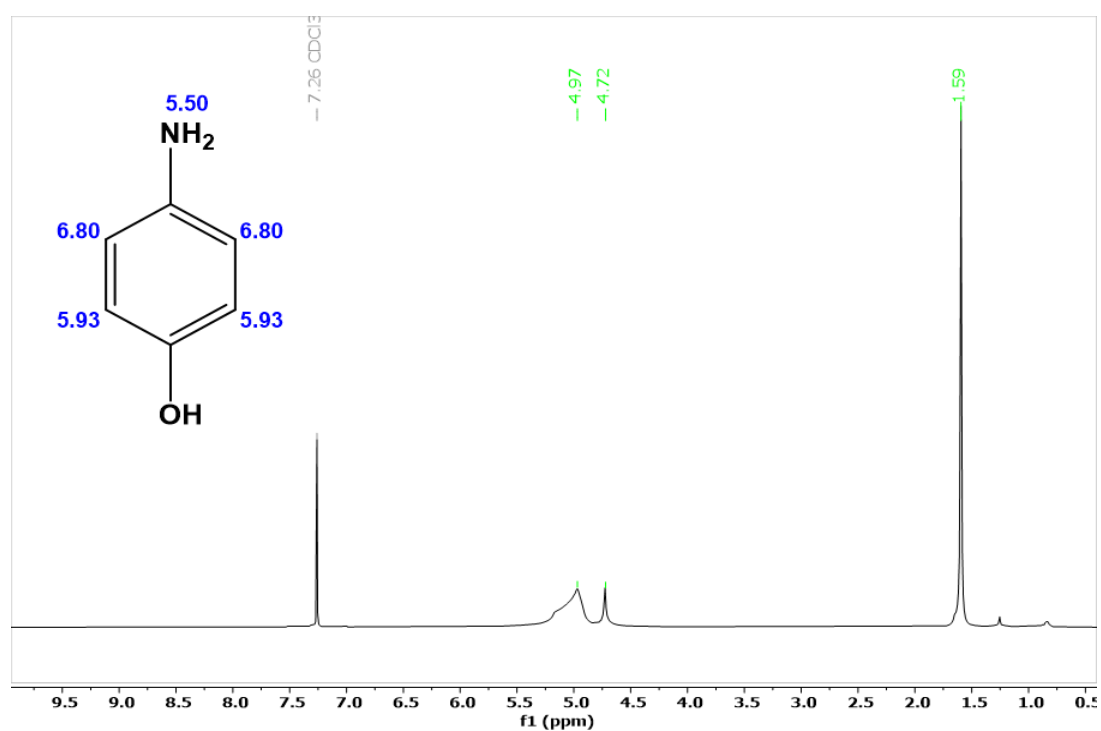

**Figure S6.** <sup>1</sup>H NMR spectra of product after the reaction showing the 4-AP peak using UiO-66 as catalyst

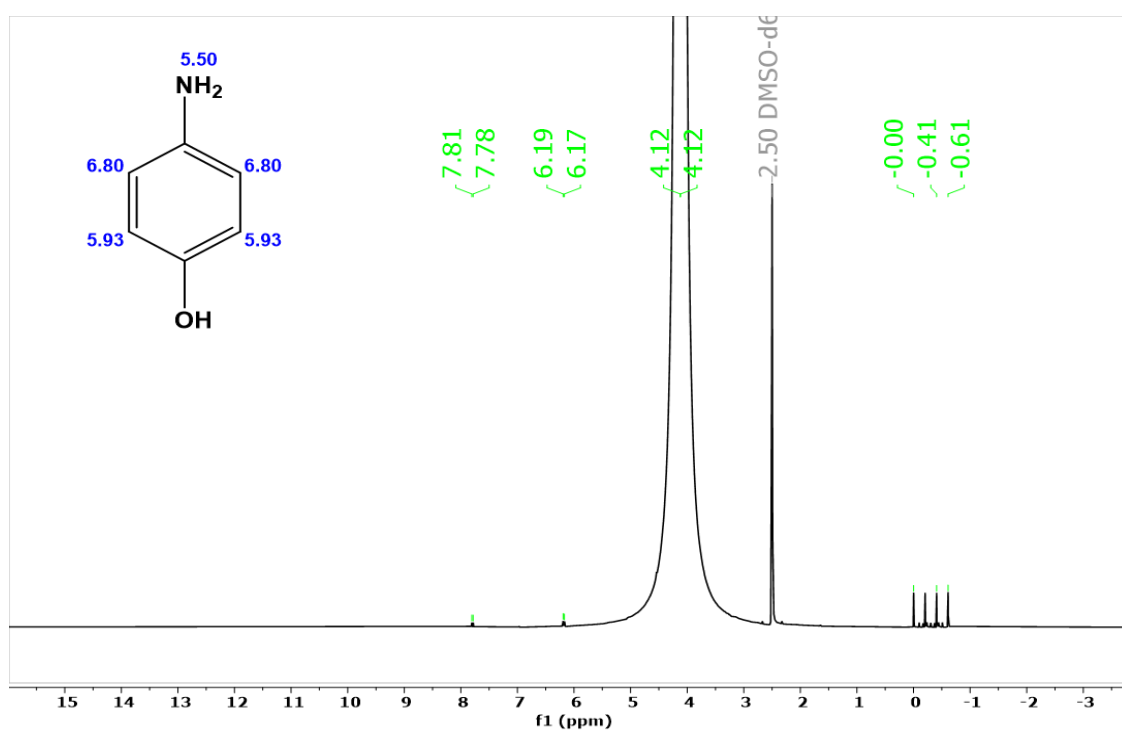

**Figure 7.** <sup>1</sup>H NMR spectra of product after the reaction showing the absence of 4-AP peak at (5.0 ppm) using UiO-66-NO<sub>2</sub> as catalyst.

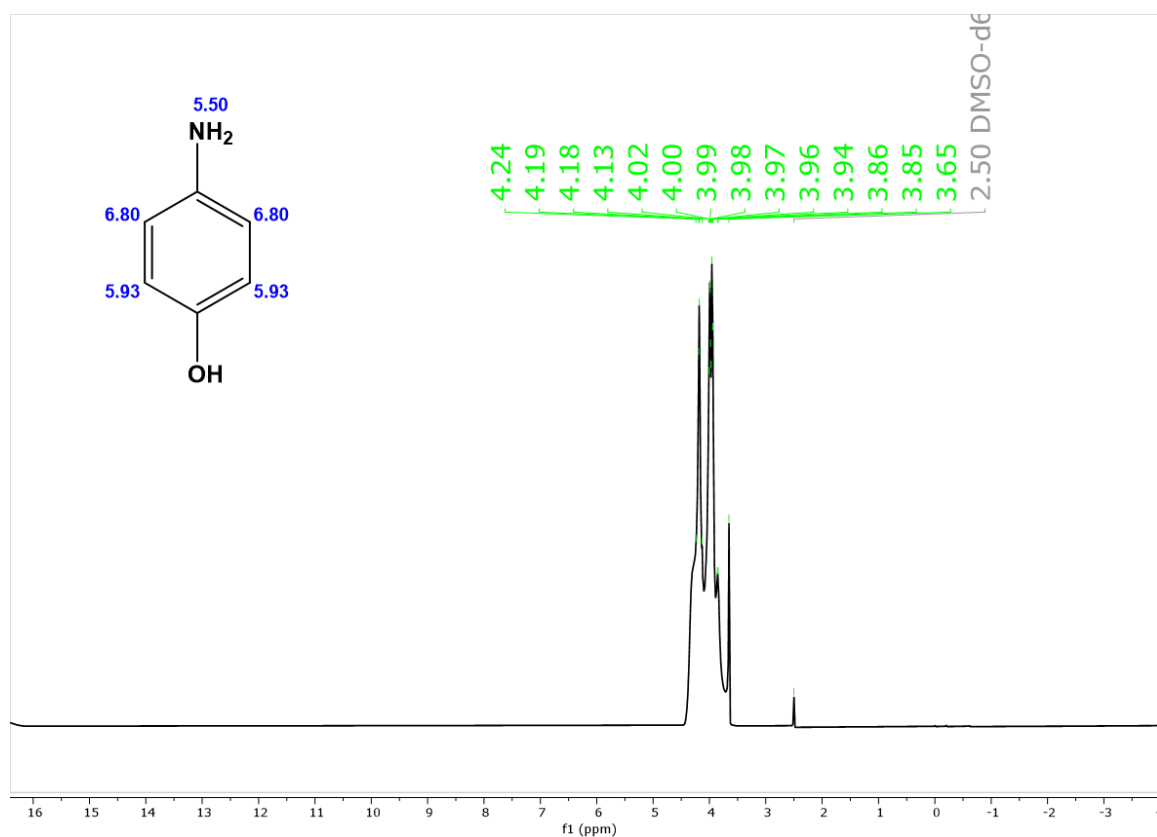

**Figure S8.**  $^1\text{H}$  NMR spectra of product after the reaction showing the absence of 4-AP peak at (5.0 ppm) using UiO-66- $\text{NH}_2$  as catalyst.

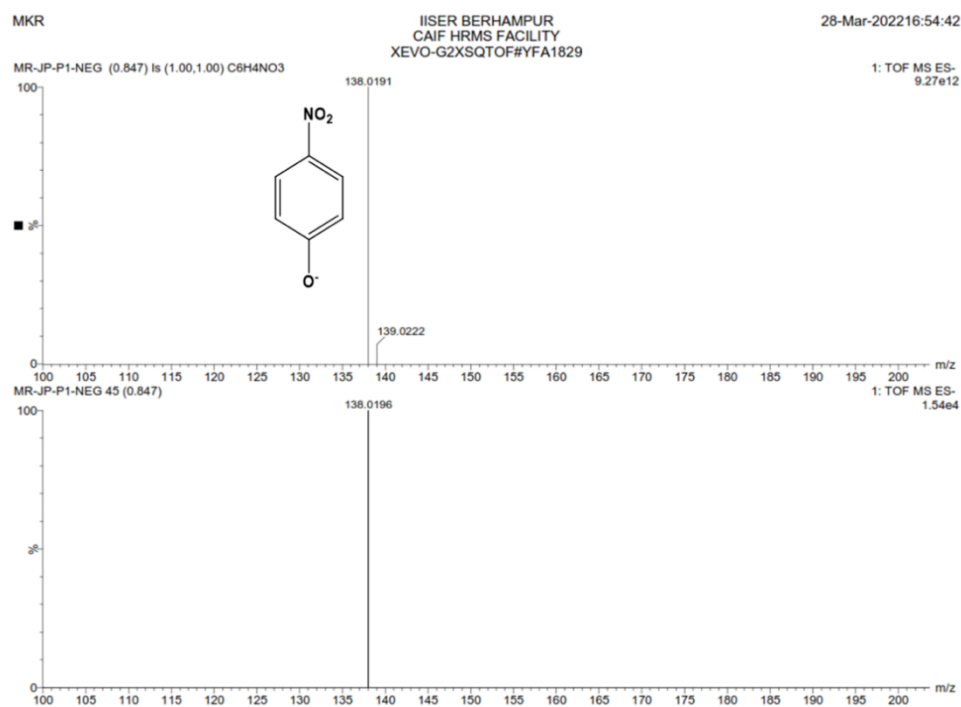

**Figure S9.** ESI-MS spectrum in negative ion mode of an aliquot taken before reaction in the presence of  $\text{NaBH}_4$  and 4-NP.

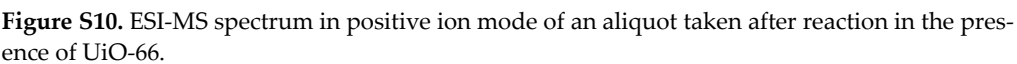

Supplement: s1 [file s1]
